# Supplementary material for: Finite element modeling and analysis of effect of preexisting cervical degenerative disease on the spinal cord during flexion and extension
Source: Springer Nature journal article supplement (doi:10.1007/s11517-023-02993-x), 2023-12-27

**Figure 1**

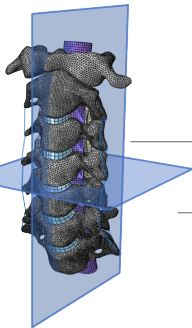

**Model Overview**

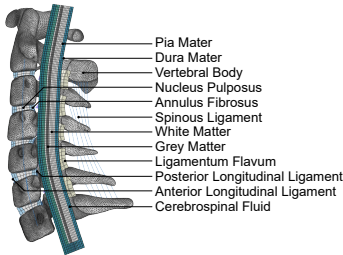

**Sagittal Section**

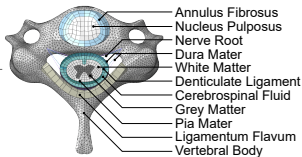

**Transverse Section**

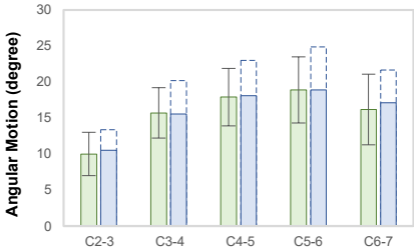

**Figure 2**

Experimental  
(Puglisi et al.)

Computational  
(Our model)

Hypermobility  
(Our model)

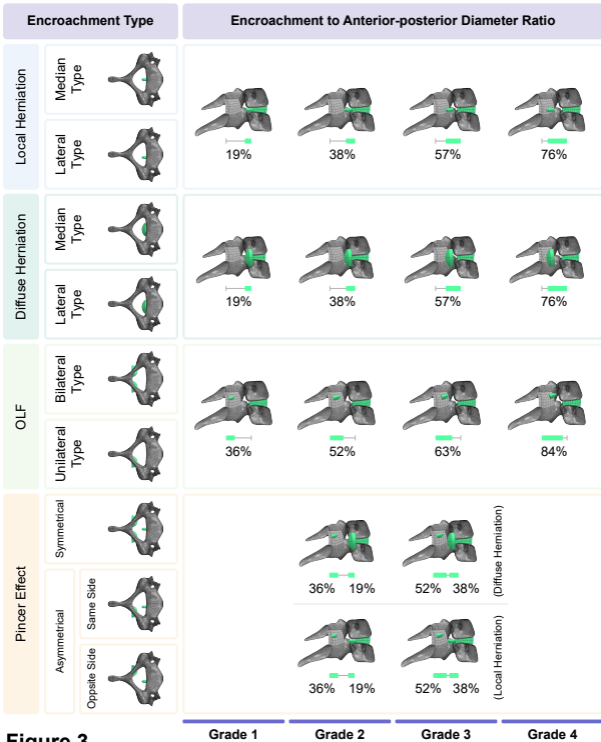

**Figure 3**

Grade 1

Grade 2

Grade 3

Grade 4

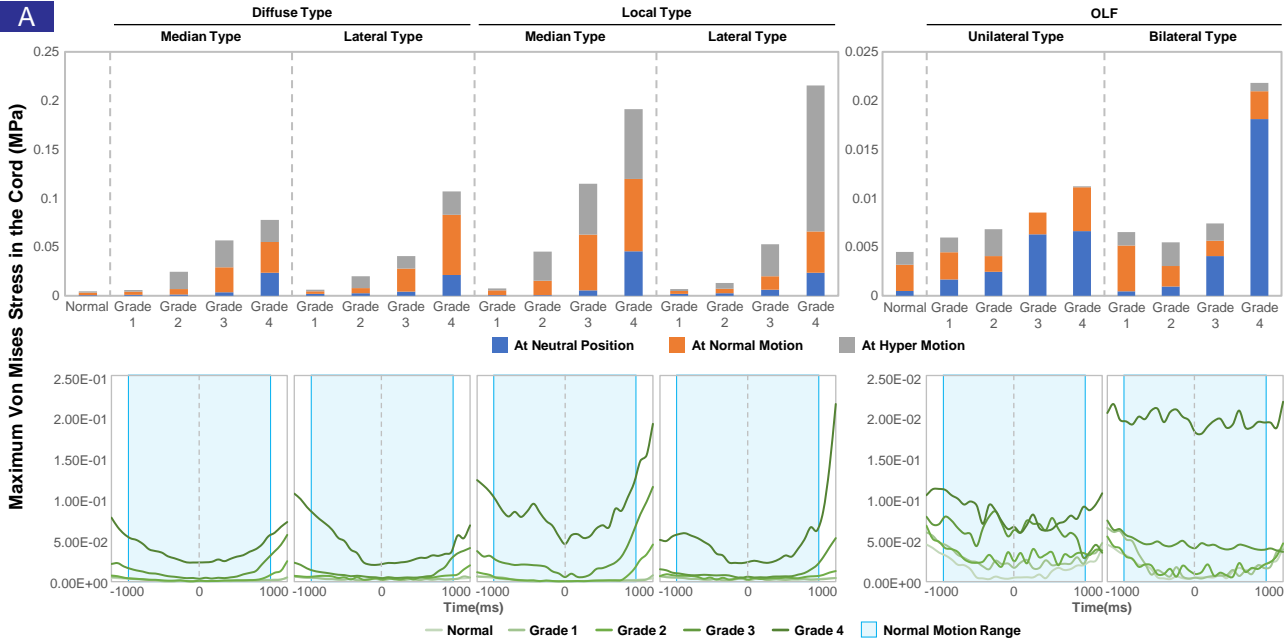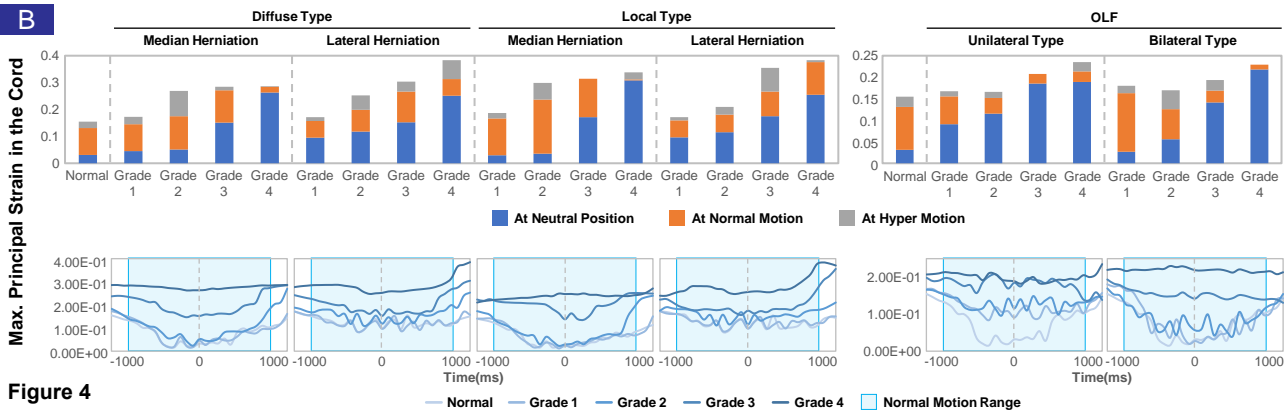

**Figure 4**





**A** Maximum Von Mises Stress in the Cord (MPa)

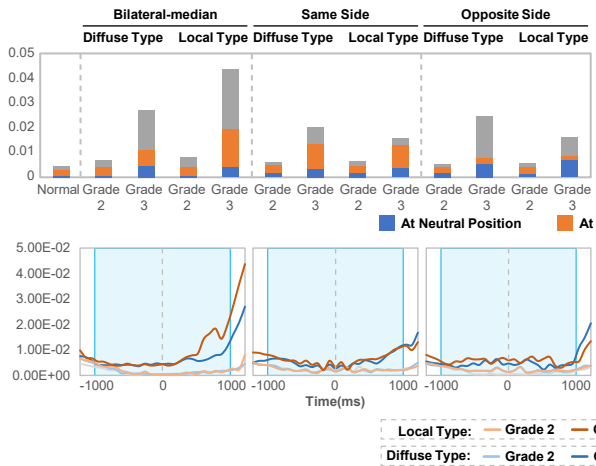

**Figure 6**

Maximum Principal Strain in the Cord

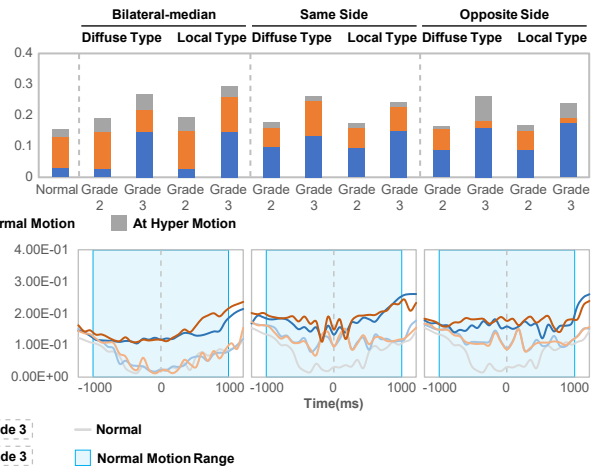

**B**

Von-Mises Stress in the Cord with both Disk Herniation and OLF (Pincer Effect)

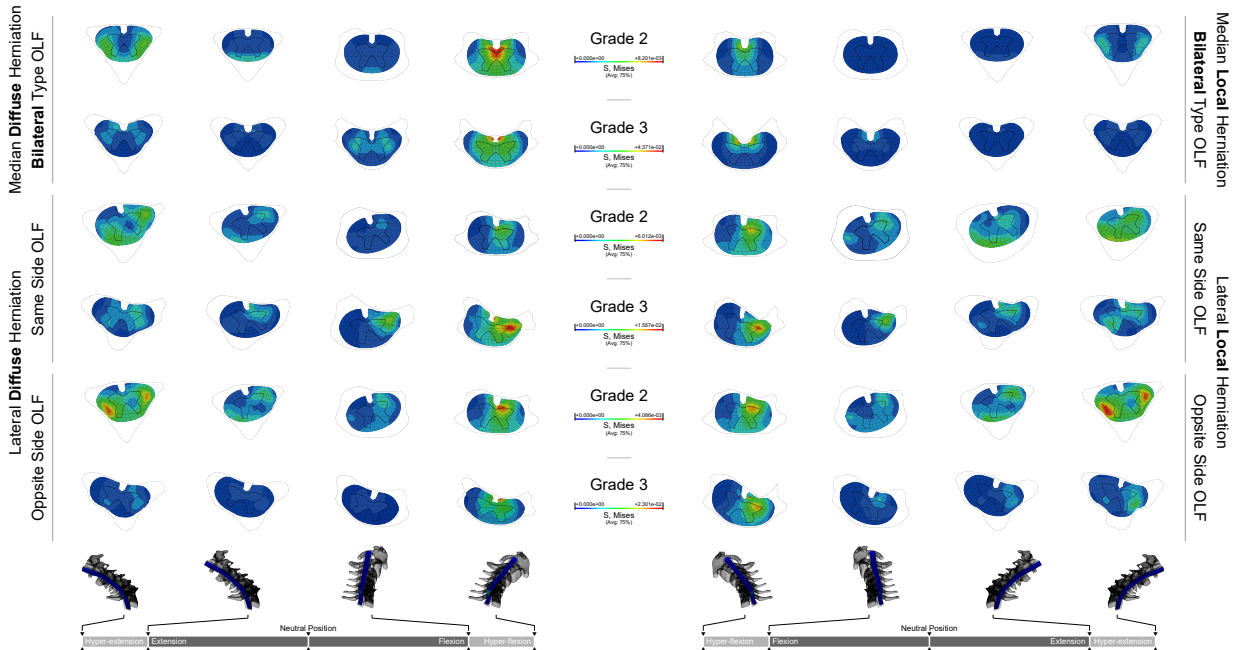

Supplement: 11517_2023_2993_MOESM1_ESM.pdf [file 11517_2023_2993_MOESM1_ESM.pdf]
